# Supplementary material for: IL-36α and Lipopolysaccharide Cooperatively Induce Autophagy by Triggering Pro-Autophagic Biased Signaling
Source: MDPI journal article supplement (doi:10.3390/biomedicines9111541), 2021-10-26
Supplement: s1 [file s1]

## Supplementary Materials

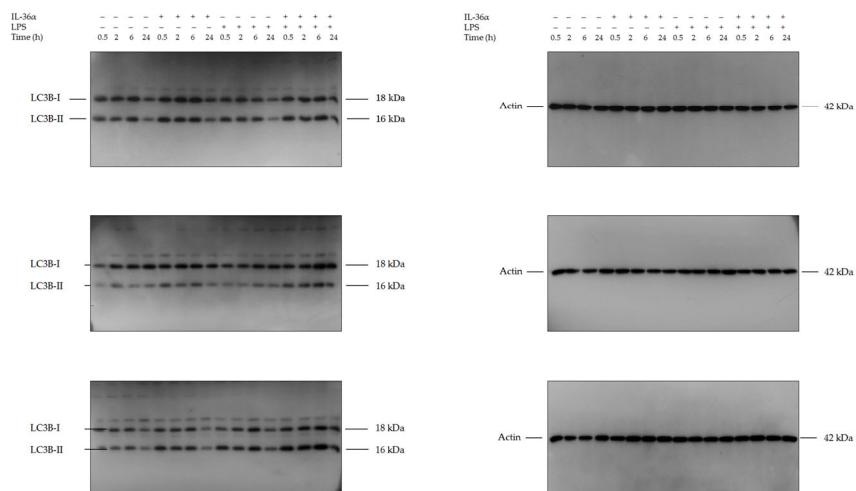

Figure S1. IL-36α and LPS cooperatively increase the level of LC3B-II.

Western blot images used to calculate the fold changes of LC3B-II shown in Figure 2B.

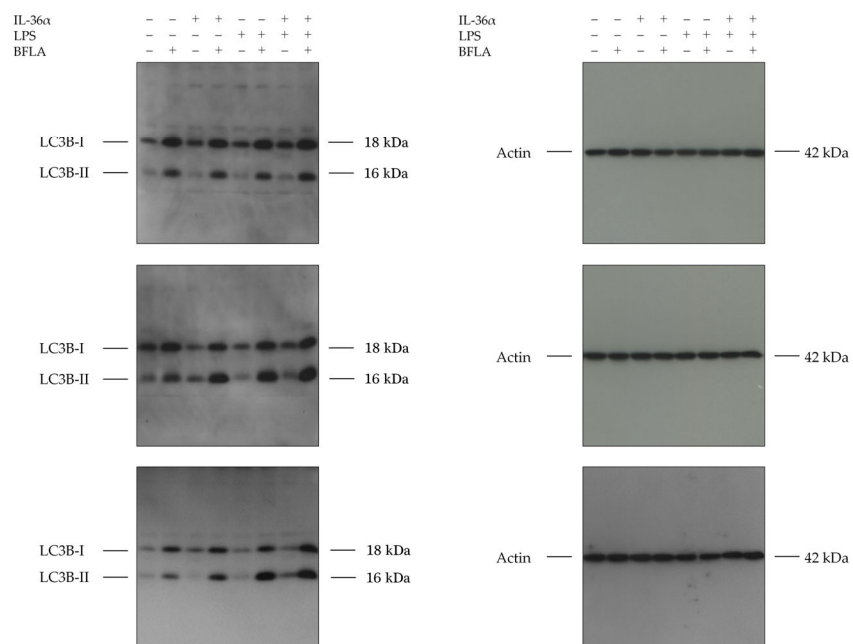

Figure S2. IL-36α and LPS cooperatively stimulate the autophagic flux.

Western blot images used to calculate the fold changes of LC3B-II shown in Figure 3B.

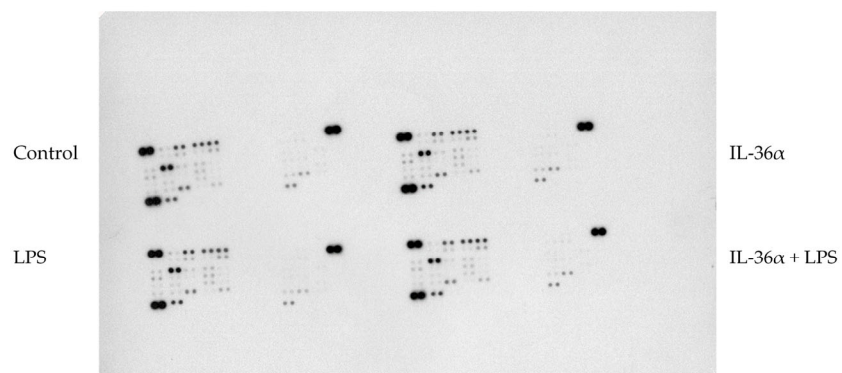

Figure S3. Differential phospho-kinase array profiles of cells treated with IL-36 $\alpha$  and LPS.

Uncropped image of the phospho-kinase array used to create Figure 5.

Table S1. List of the detected phospho-proteins by using the Proteome Profiler™ human phospho-kinase array kit.

| Membrane/ Coordinate | Target/Control           | Phosphorylation Site  |
|----------------------|--------------------------|-----------------------|
| A-A1, A2             | Reference Spot           | -                     |
| A-A3, A4             | p38 $\alpha$             | T180/Y182             |
| A-A5, A6             | ERK1/2                   | T202/Y204, T185/ Y187 |
| A-A7, A8             | JNK1/2/3                 | T183/Y185, T221/ Y223 |
| A-A9, A10            | GSK-3 $\alpha$ / $\beta$ | S21/S9                |
| B-A13, A14           | p53                      | S392                  |
| B-A17, A18           | Reference Spot           | -                     |
| A-B3, B4             | EGFR                     | Y1086                 |
| A-B5, B6             | MSK1/2                   | S376/S360             |
| A-B7, B8             | AMPK $\alpha$ 1          | T183                  |
| A-B9, B10            | Akt 1/2/3                | S473                  |
| B-B11, B12           | Akt 1/2/3                | T308                  |
| B-B13, B14           | p53                      | S46                   |
| A-C1, C2             | TOR                      | S2448                 |
| A-C3, C4             | CREB                     | S133                  |
| A-C5, C6             | HSP27                    | S78/S82               |
| A-C7, C8             | AMPK $\alpha$ 2          | T172                  |
| A-C9, C10            | $\beta$ -Catenin         | -                     |
| B-C11, C12           | p70 S6 Kinase            | T389                  |
| B-C13, C14           | p53                      | S15                   |
| B-C15, C16           | c-Jun                    | S63                   |
| A-D1, D2             | Src                      | Y419                  |
| A-D3, D4             | Lyn                      | Y397                  |
| A-D5, D6             | Lck                      | Y394                  |
| A-D7, D8             | STAT2                    | Y689                  |
| A-D9, D10            | STAT5a                   | Y694                  |
| B-D11, D12           | p70 S6 Kinase            | T421/S424             |
| B-D13, D14           | RSK1/2/3                 | S380/S386/S377        |
| B-D15, D16           | eNOS                     | S1177                 |
| A-E1, E2             | Fyn                      | Y420                  |
| A-E3, E4             | Yes                      | Y426                  |
| A-E5, E6             | Fgr                      | Y412                  |
| A-E7, E8             | STAT6                    | Y641                  |
| A-E9, E10            | STAT5b                   | Y699                  |
| B-E11, E12           | STAT3                    | Y705                  |
| B-E13, E14           | p27                      | T198                  |
| B-E15, E16           | PLC- $\gamma$ 1          | Y783                  |
| A-F1, F2             | Hck                      | Y411                  |
| A-F3, F4             | Chk-2                    | T68                   |
| A-F5, F6             | FAK                      | Y397                  |
| A-F7, F8             | PDGF R $\beta$           | Y751                  |
| A-F9, F10            | STAT5a/b                 | Y694/Y699             |
| B-F11, F12           | STAT3                    | S727                  |
| B-F13, F14           | WNK1                     | T60                   |
| B-F15, F16           | PYK2                     | Y402                  |
| A-G1, G2             | Reference Spot           | -                     |

|                   |                        |      |
|-------------------|------------------------|------|
| <b>A-G3, G4</b>   | PRAS40                 | T246 |
| <b>A-G9, G10</b>  | PBS (Negative Control) | -    |
| <b>B-G11, G12</b> | HSP60                  | -    |
| <b>B-G17, G18</b> | PBS (Negative Control) | -    |

The IL-36 $\alpha$ /LPS combination reduces the activation level of the PI3K/Akt/mTORC1 axis by triggering rapid depletion of PIP2 at the cytoplasmic membrane. As a result, mTOR-mediated inhibition of autophagy is alleviated. Additionally, the IL-36 $\alpha$ /LPS combination increases the activation level of PI3KC3 complex via the activation of MyD88, TRAF3, and TRAF6. As a result, autophagosome formation is stimulated. Thus, this cytokine/PAMP combination triggers pro-autophagic biased signaling by several mechanisms and thereby stimulates the autophagic cascade cooperatively.
